# Supplementary material for: Ketamine’s antidepressant effect is mediated by energy metabolism and antioxidant defense system
Source: PubMed Central journal article supplement (PMC5694011; doi:10.1038/s41598-017-16183-x), 2017-11-17
Supplement: 41598_2017_16183_MOESM4_ESM.pdf [file 41598_2017_16183_MOESM4_ESM.pdf]

## **Ketamine's antidepressant effect is mediated by energy metabolism and antioxidant defense system**

Weckmann Katja<sup>1,+</sup>; Deery Mike<sup>2</sup>; Howard Julie<sup>2</sup>; Feret Renata<sup>2</sup>; Asara John M<sup>3</sup>; Dethloff Frederik<sup>1</sup>; Filiou Michaela D<sup>4</sup>; Iannace Jamie<sup>1</sup>; Labermaier Christiana<sup>1</sup>; Maccarrone Giuseppina<sup>1</sup>; Webhofer Christian<sup>1</sup>; Teplytska Larysa<sup>1</sup>; Lilley Kathryn<sup>2</sup>; Müller Marianne<sup>5</sup>; Turck Christoph W<sup>1\*</sup>

<sup>1</sup>*Max Planck Institute of Psychiatry, Department of Translational Research in Psychiatry, Munich, Germany;*

<sup>2</sup>*Cambridge Centre for Proteomics, Cambridge System Biology Centre, University of Cambridge, Cambridge, UK;*

<sup>3</sup>*Division of Signal Transduction, Beth Israel Deaconess Medical Center and Department of Medicine, Harvard Medical School, Boston, USA;*

<sup>4</sup>*Max Planck Institute of Psychiatry, Department of Stress Neurobiology and Neurogenetics, Munich, Germany*

<sup>5</sup>*Experimental Psychiatry, Department of Psychiatry and Psychotherapy & Focus Program Translational Neuroscience, Johannes Gutenberg University Medical Center, Mainz, Germany*

<sup>\*</sup>*Present address: Institute of Pathobiochemistry, Johannes Gutenberg University, Medical School, Mainz, Germany*

### **\*Corresponding author:**

Prof. Dr. Christoph W. Turck

Max Planck Institute of Psychiatry, Department of Translational Research in Psychiatry, Kraepelinstrasse 2-10, 80804 Munich, Germany

Phone: +49-89-30622317

E-mail: [turck@psych.mpg.de](mailto:turck@psych.mpg.de)

2h

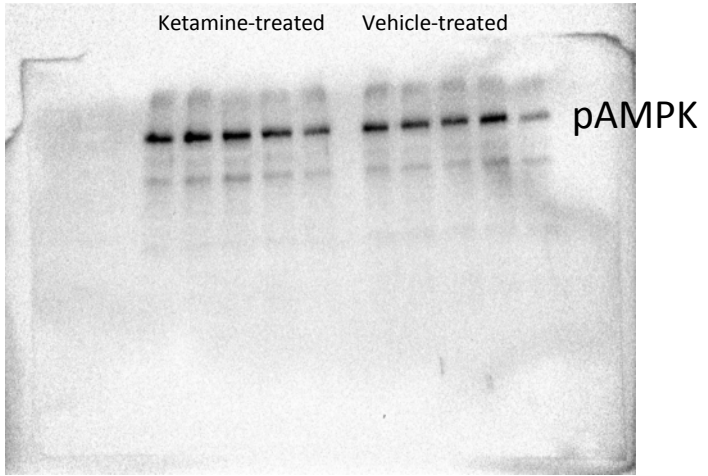

14h

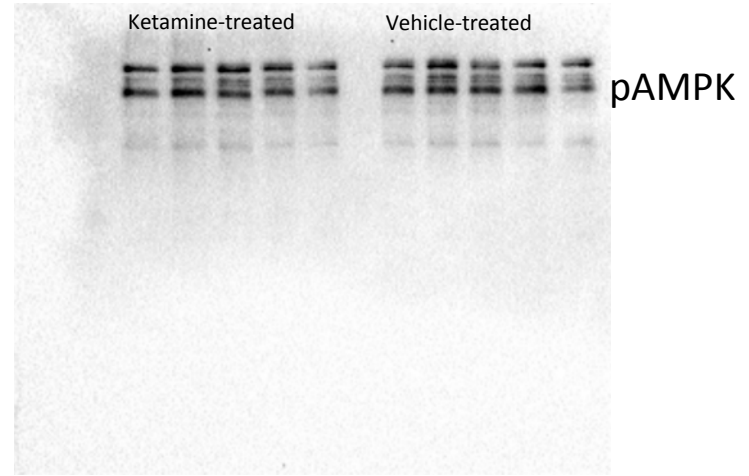

24h

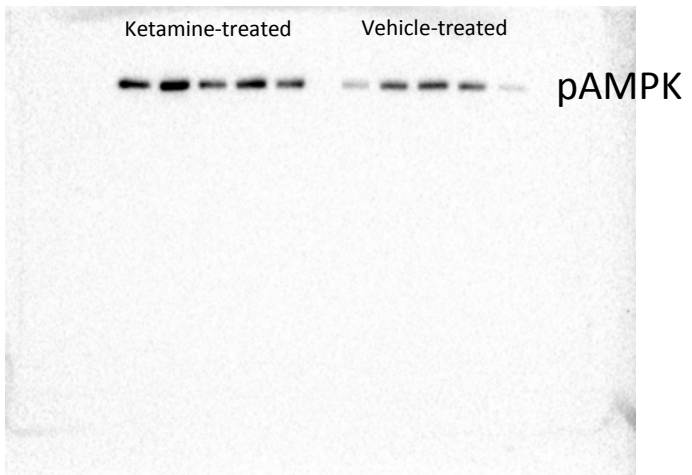

72h

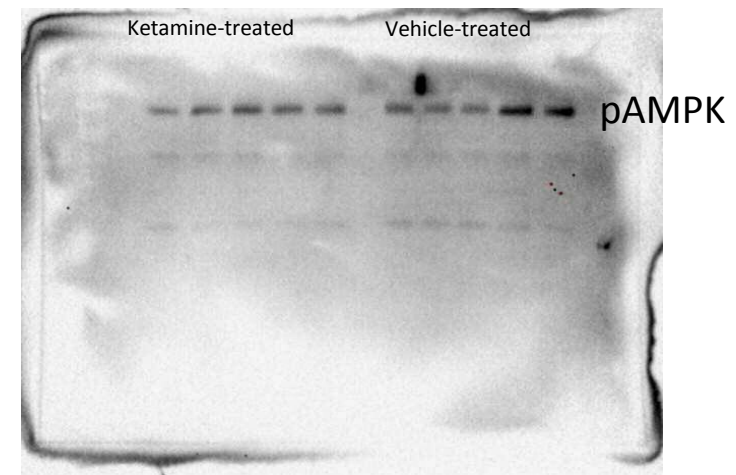

**Supplemental figure 1A:** Time-dependent Western blot analysis of AMP-activated protein kinase (AMPK). N=5 mice per group and time point.

2h

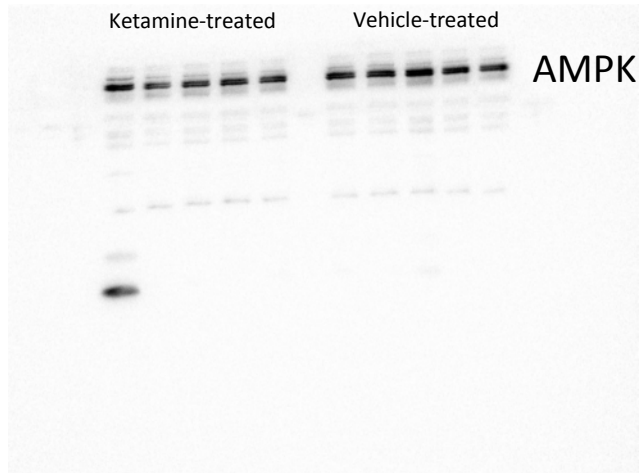

14h

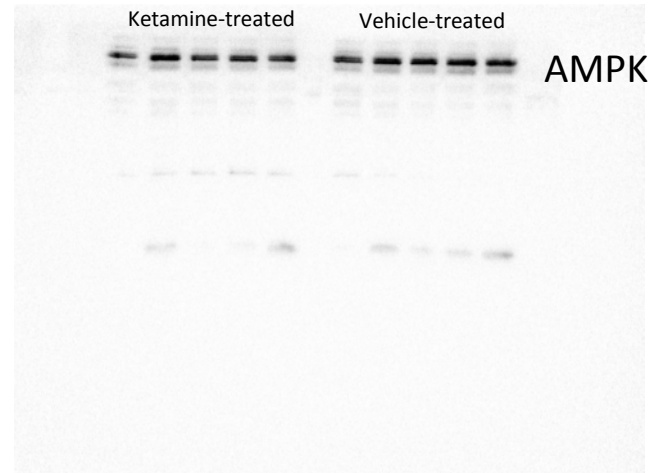

24h

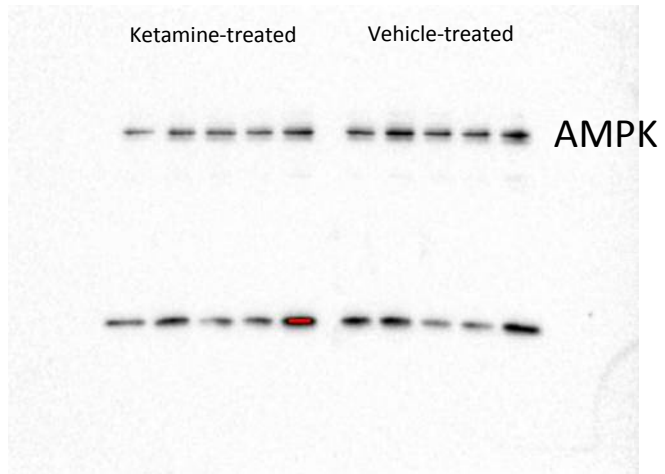

72h

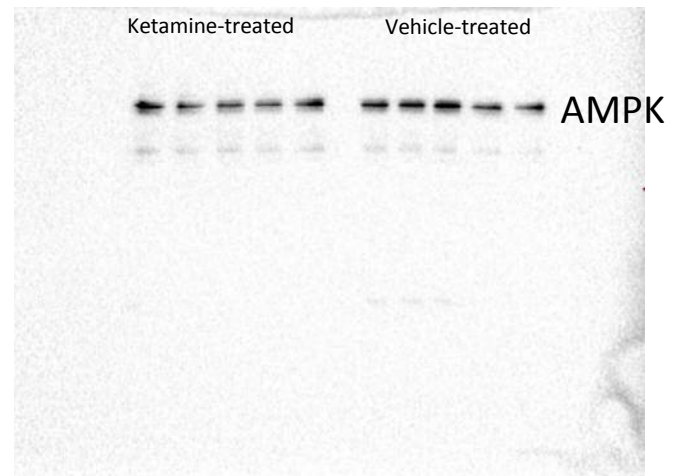

**Supplemental figure 1B:** Time-dependent Western blot analysis of phosphorylated AMP-activated protein kinase (pAMPK). N=5 mice per group and time point.

2h

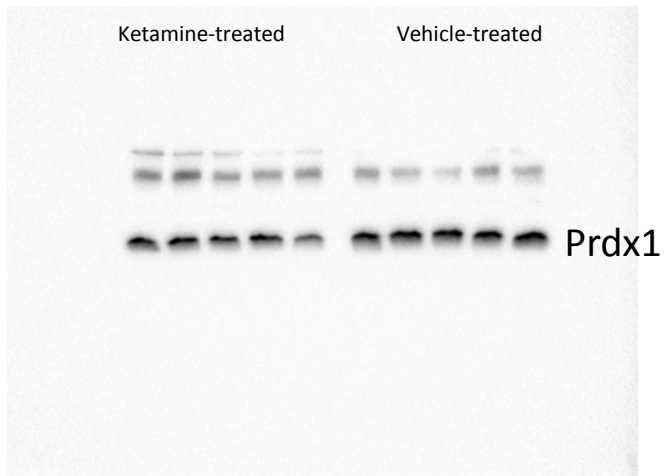

14h

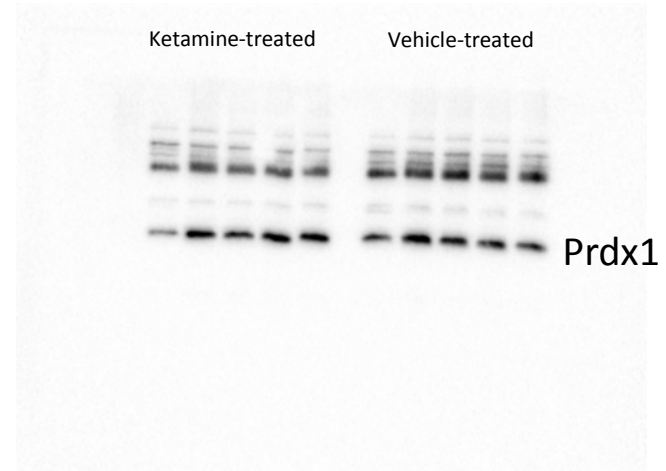

24h

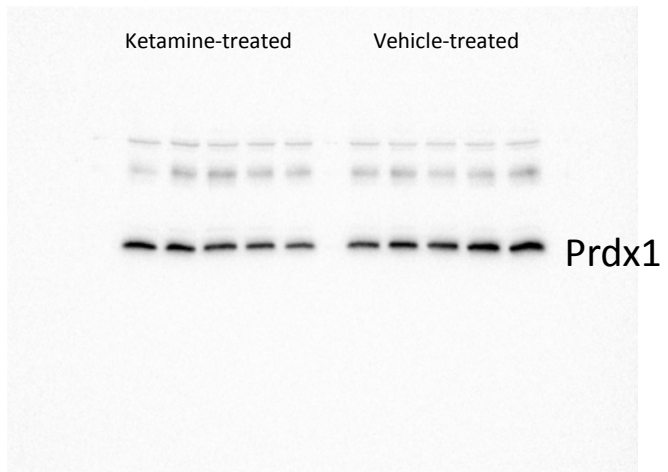

72h

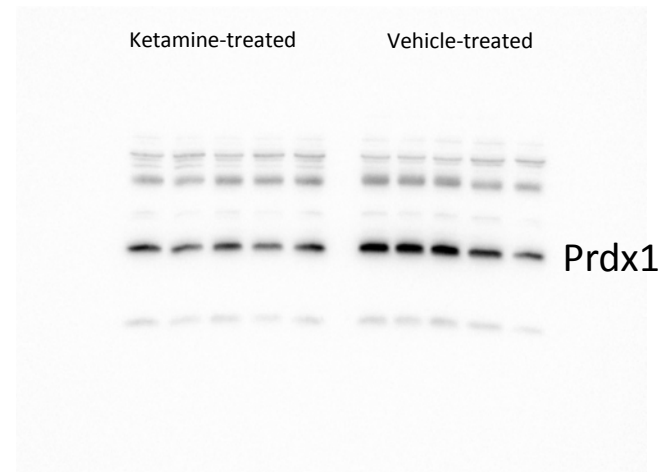

**Supplemental figure 1C:** Time-dependent Western blot analysis of Peroxiredoxin (Prdx) 1. N=5 mice per group and time point.

2h

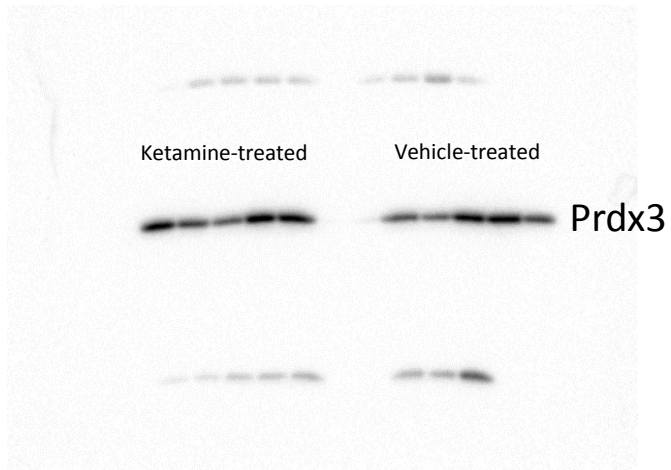

14h

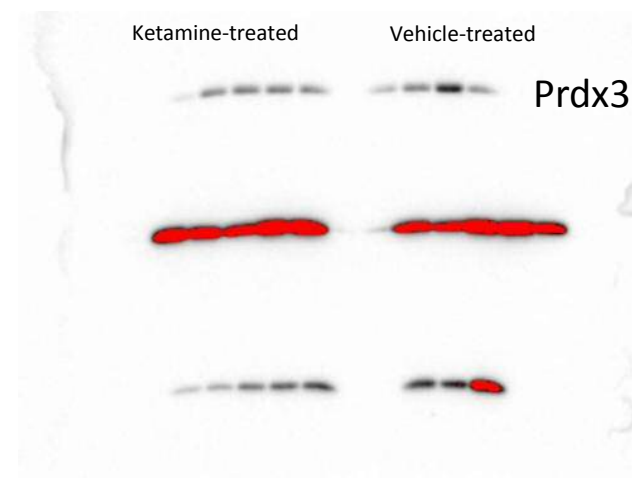

24h

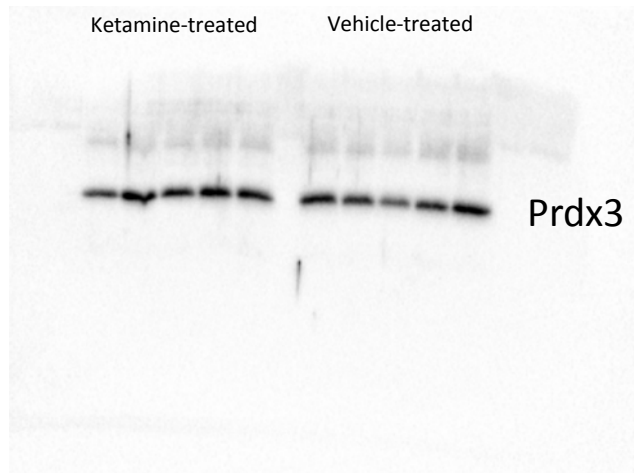

72h

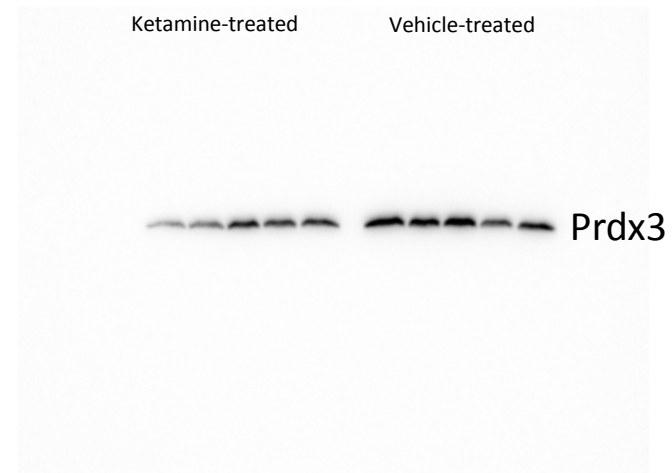

**Supplemental figure 1D:** Time-dependent Western blot analysis of Peroxiredoxin (Prdx) 3. Blots were cut at the respective band size of Prdx3 and considered for the 2h and 14h time point. N=5 mice per group at the 2h, 24h and 72h time point, n=5 for ketamine-treated and n=4 for vehicle-treated at the 14h time point.
